# Supplementary material for: Quantitative Evaluation of the Compatibility Effects of Huangqin Decoction on the Treatment of Irinotecan-Induced Gastrointestinal Toxicity Using Untargeted Metabolomics
Source: PubMed Central journal article supplement (PMC5399027; doi:10.3389/fphar.2017.00211), 2017-04-21
Supplement: Presentation_1.pdf [file Presentation_1.pdf]

*Supplementary Information*

**Quantitative evaluation of the compatibility effects of  
Huangqin decoction on the treatment of irinotecan-induced  
gastrointestinal toxicity using untargeted metabolomics**

**Dong-ni Cui<sup>1,2</sup>, Xu Wang<sup>1,2</sup>, Jia-qing Chen<sup>1,2</sup>, Bo Lv<sup>1,2</sup>, Pei Zhang<sup>1,2</sup>, Wei Zhang<sup>3</sup>,  
Zun-jian Zhang<sup>1,2\*\*</sup>, Feng-guo Xu<sup>1,2\*</sup>**

<sup>1</sup>MOE Key Laboratory of Drug Quality Control and Pharmacovigilance, China Pharmaceutical University, Nanjing, 210009, China

<sup>2</sup>State Key Laboratory of Natural Medicine, China Pharmaceutical University, Nanjing, 210009, China

<sup>3</sup>State Key Laboratory for Quality Research in Chinese Medicines, Macau University of Science and Technology, Taipa, Macau, China

**\* Correspondence:**

Zun-jian Zhang

Email: [zunjianzhangcpu@hotmail.com](mailto:zunjianzhangcpu@hotmail.com)

Feng-guo Xu

Email: [fengguoxu@gmail.com](mailto:fengguoxu@gmail.com)

## 2 Materials and methods

### 2.3 Animal study and sampling

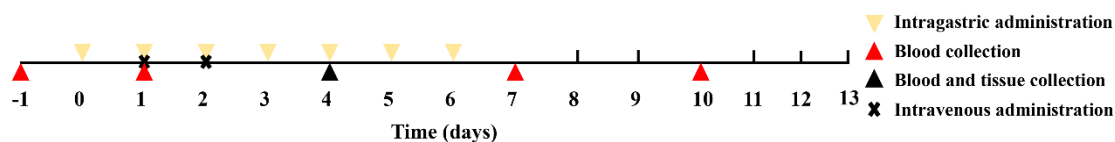

Fig. S1 Flow chart of animal experiments.

### 2.4 Sample preparation and metabolomic analysis

#### 2.4.1 Sample preparation

Serum samples were thawed at room temperature. 100  $\mu\text{L}$  acetonitrile and 40  $\mu\text{L}$  glibenclamide (internal standard (IS), 5  $\mu\text{g}/\text{mL}$ ) were added to 20  $\mu\text{L}$  serum and the mixture was vortexed for 5 min to extract metabolites. After centrifuged twice at 16 000 rpm (4  $^{\circ}\text{C}$ ) for 10 min, the supernatant was transferred and analyzed by LC/MS.

100 mL of cold methanol (containing 5  $\mu\text{g}/\text{mL}$  heptadecanoic acid, working as IS) was added to 10  $\mu\text{L}$  of thawed serum and vortex-mixed for 15 min to extract metabolites. After a second centrifugation (16 000 rpm, 10 min, 4  $^{\circ}\text{C}$ ), an 80  $\mu\text{L}$  supernatant was obtained and transferred to a screw vial (1 mL) followed by the addition of methoxamine hydrochloride (25  $\mu\text{L}$ , 10 mg/mL in dry pyridine) and incubation at 37  $^{\circ}\text{C}$  for 90 min. The mixture was evaporated to dryness and then silylated with 120  $\mu\text{L}$  MSTFA/ethyl acetate (v/v, 1/1). After incubation for 2 hours at a temperature of 37  $^{\circ}\text{C}$ , the mixture was prepared for GC/MS analysis.

#### 2.4.2 LC/MS analysis

LC/MS analysis was performed on Shimadzu ultrafast LC-ion trap time-of flight MS system equipped with an electrospray ionization (ESI) source (Shimadzu, Kyoto, Japan). Chromatographic separation was achieved on a Phenomenex Kinelex C18 column (100  $\times$  2.1 mm, 2.6 mm, Phenomenex, Torrance, CA, USA) using a gradient elution involved 5 - 95% acetonitrile-aqueous formic acid (0.1% formic acid), 20 min; maintained with 95% acetonitrile in 3 min. The column oven was maintained at 40  $^{\circ}\text{C}$  and the flow rate of 0.4 mL/min. The ESI-MS were acquired in both positive and negative ion mode with an interface voltage of 4.5 kV and - 3.5 kV respectively. The range was scanned from 100 to 1000 m/z. The flow rate of nebulizing gas was 1.5 L/min and pressure of drying gas was 100 kPa. The temperature of heat block and curved desorption line were both 200  $^{\circ}\text{C}$ . LC/MS solution version 3.0 (Shimadzu, Kyoto, Japan) was used for mass spectra acquisition and chromatograms procession.

#### 2.4.3 GC/MS analysis

Analysis was performed on Shimadzu GCMS-QP2010 Ultra (Shimadzu, Kyoto, Japan) equipped with a 30.0 m × 0.25 mm i.d. fused-silica capillary column with 0.25 mm Rtx-5MS stationary phase (Agilent, Shanghai, China). Helium was used as carrier gas and set at 1 mL/min. An injection volume of 1 mL was used with the split ratio of 50:1. The column temperature was initially kept at 70 °C for 3 min and then increased to 320 °C at 10 °C/min, where it was held for 2 min. The injector temperature, interface temperature and ion source temperature were set at 250 °C, 200 °C, 250 °C, respectively. Masses were acquired from m/z 45 to 600 in scan mode. The acceleration voltage was turned on after a solvent delay of 5 min. Mass spectra and chromatograms were acquired and processed with GC/MS solution version 2.7 (Shimadzu, Kyoto, Japan).

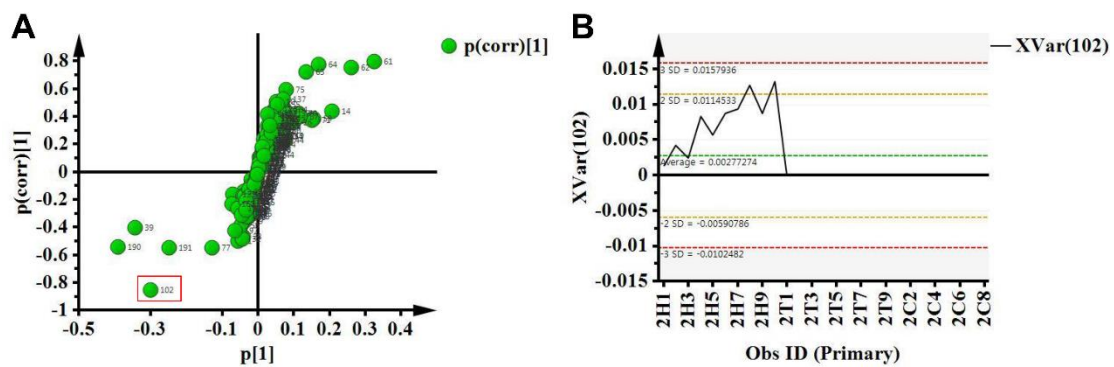

**Fig. S2 Excluding chemical components come from HQD (or SS, SF decoctions).** (A) Score plot. For example: 102 is an exogenous compound from HQD. (B) Trend plot of 102. SS: single *S. baicalensis*; BB: baicalin and baicalein; SF: *S. baicalensis* free; T: CPT-11.

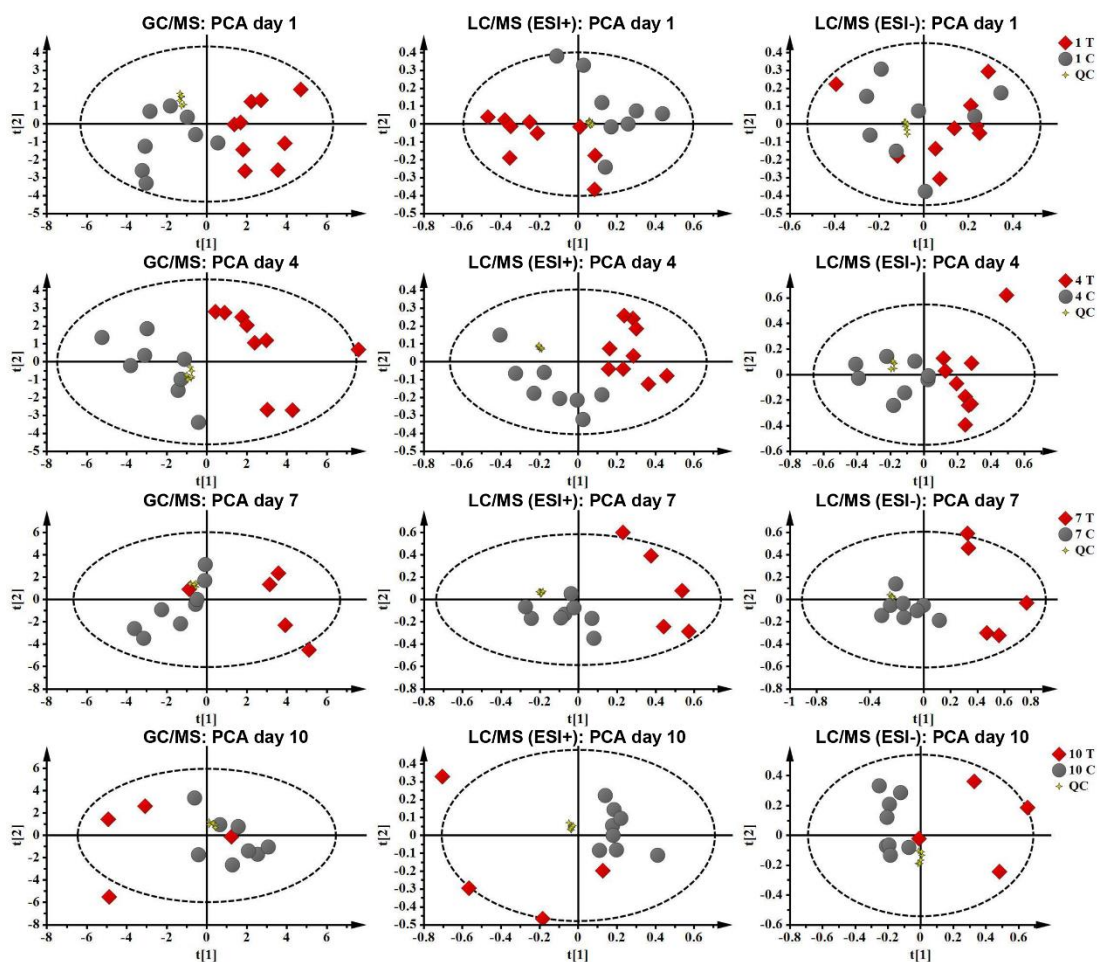

**Fig. S3** PCA score plots of CPT-11 and control group at day 1, 4, 7, 10. (A)-(C): day 1; (D)-(F): day 4; (G)-(I): day 7; (J)-(L): day 10. (QC is quality control) Parameter of models are as follow:

| model  | parameter        | UFLC-IT-TOF/MS (+) | UFLC-IT-TOF/MS (-) | GC/MS |
|--------|------------------|--------------------|--------------------|-------|
| Day 1  | R <sup>2</sup> X | 0.787              | 0.812              | 0.753 |
|        | Q <sup>2</sup>   | 0.615              | 0.290              | 0.439 |
| Day 4  | R <sup>2</sup> X | 0.772              | 0.678              | 0.763 |
|        | Q <sup>2</sup>   | 0.464              | 0.226              | 0.451 |
| Day 7  | R <sup>2</sup> X | 0.779              | 0.771              | 0.694 |
|        | Q <sup>2</sup>   | 0.550              | 0.514              | 0.302 |
| Day 10 | R <sup>2</sup> X | 0.877              | 0.736              | 0.726 |
|        | Q <sup>2</sup>   | 0.488              | 0.356              | 0.338 |

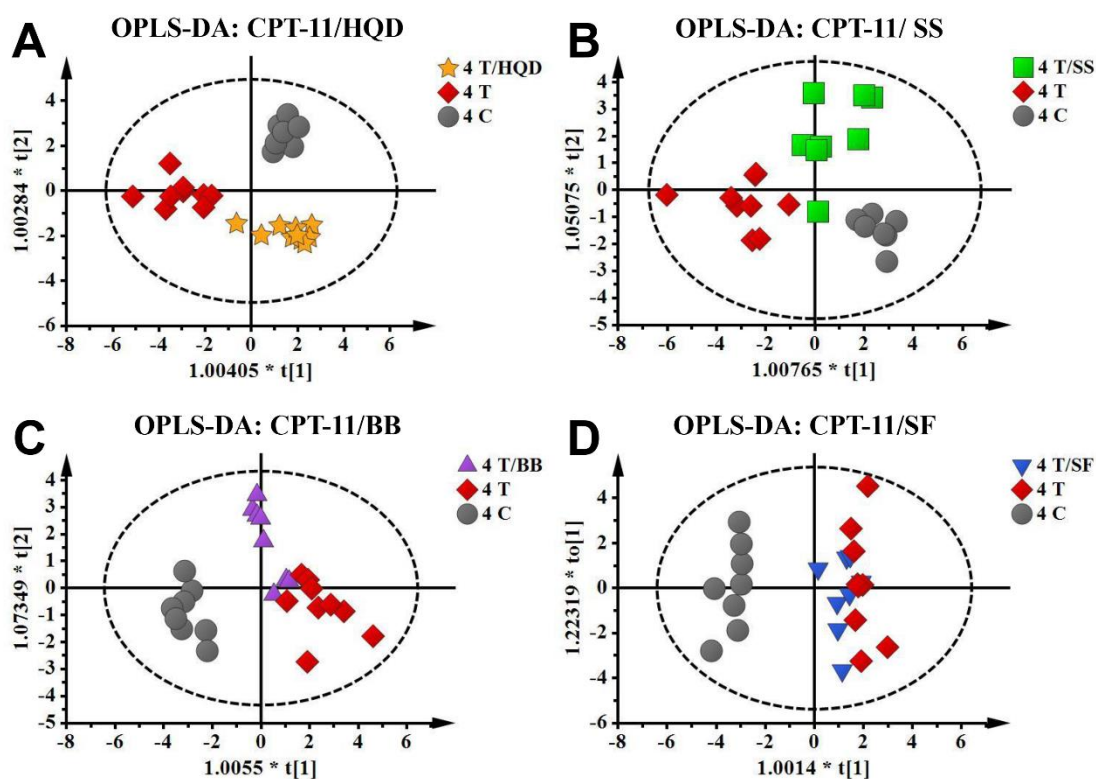

**Fig. S4 OPLS-DA score plots of serum metabonomic on day 4 after CPT-11 treatment as well as TCM (HQD, SS, BB, or SF decoctions) modification. (A) HQD,  $R^2X = 0.684$ ,  $R^2Y = 0.903$ ,  $Q^2 = 0.746$ ; (B) SS,  $R^2X = 0.632$ ,  $R^2Y = 0.765$ ,  $Q^2 = 0.534$ ; (C) BB,  $R^2X = 0.597$ ,  $R^2Y = 0.727$ ,  $Q^2 = 0.506$ ; (D) SF,  $R^2X = 0.562$ ,  $R^2Y = 0.502$ ,  $Q^2 = 0.347$ . SS: single *S. baicalensis*; BB: baicalin and baicalein; SF: *S. baicalensis* free; T: CPT-11.**

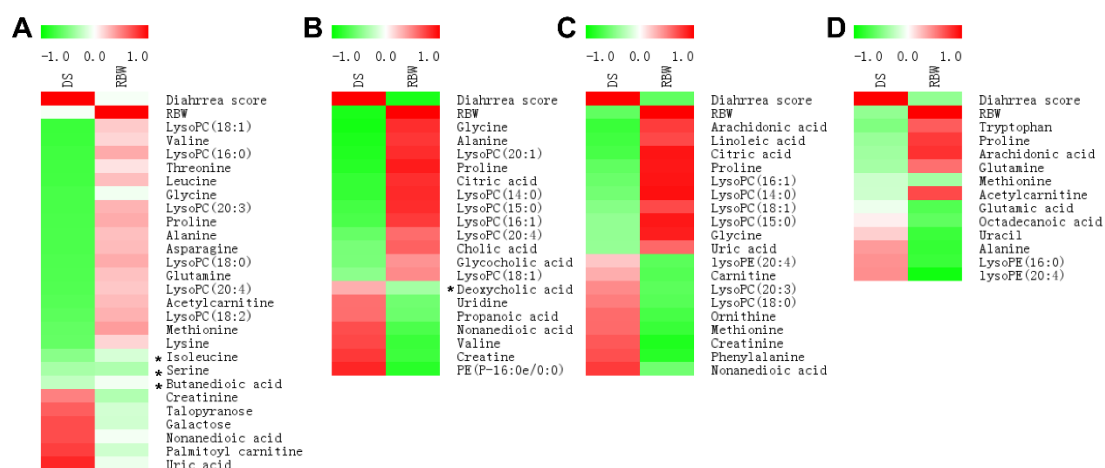

**Fig. S5 Spearman correlation analysis of serum marker metabolites, diarrhea scores and body weight ratios. (A) day 1, (B) day 4, (C) day 7, (D) day 10.** Green squares indicate significant negative correlations ( $-0.5$  to  $-1$ ,  $p < 0.05$ ), white squares indicate nonapplicable correlations, and red squares indicate significant positive correlations ( $0.5$  to  $1$ ,  $p < 0.05$ ). (\*) nonapplicable correlations metabolites.

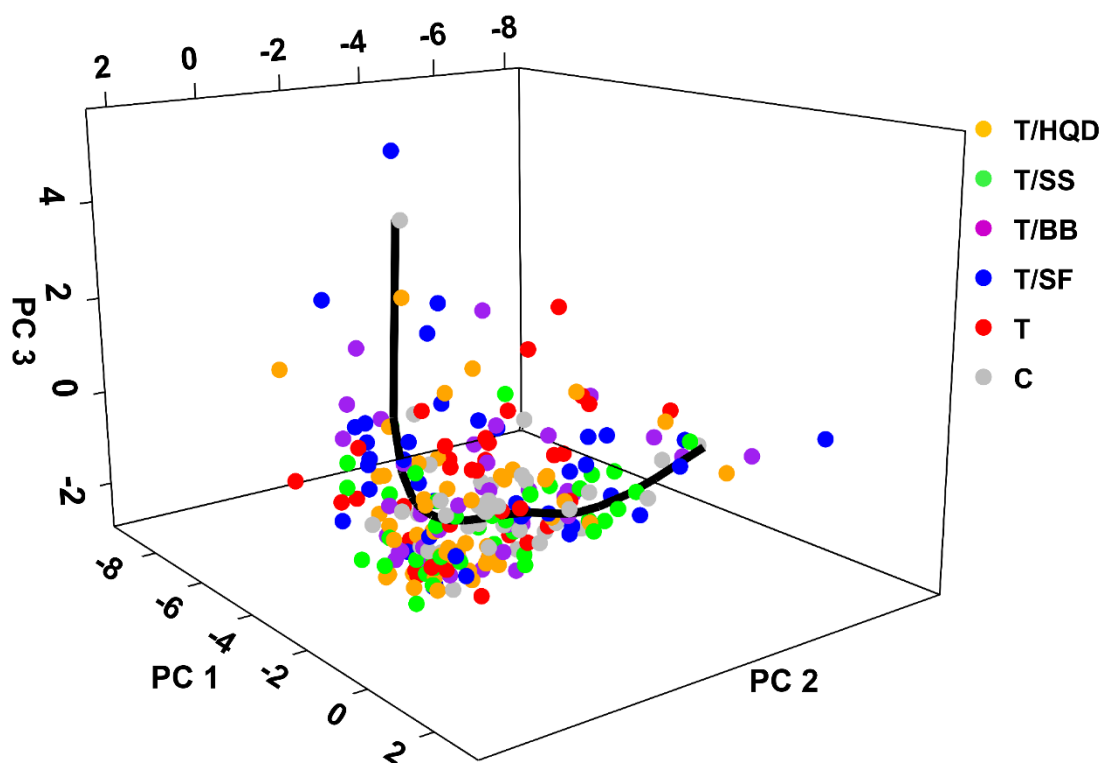

**Fig. S6 The principal curve learned for the TCM (HQD, SS, BB, SF decoctions) efficacy.** The principal curve (in black) going through the cloud of control samples. Other samples (from groups T/HQD, T/SS, T/BB, T/SF, C and T) projected onto the curve. SS: single *S. baicalensis*; BB: baicalin and baicalein; SF: *S. baicalensis* free; T: CPT-11.



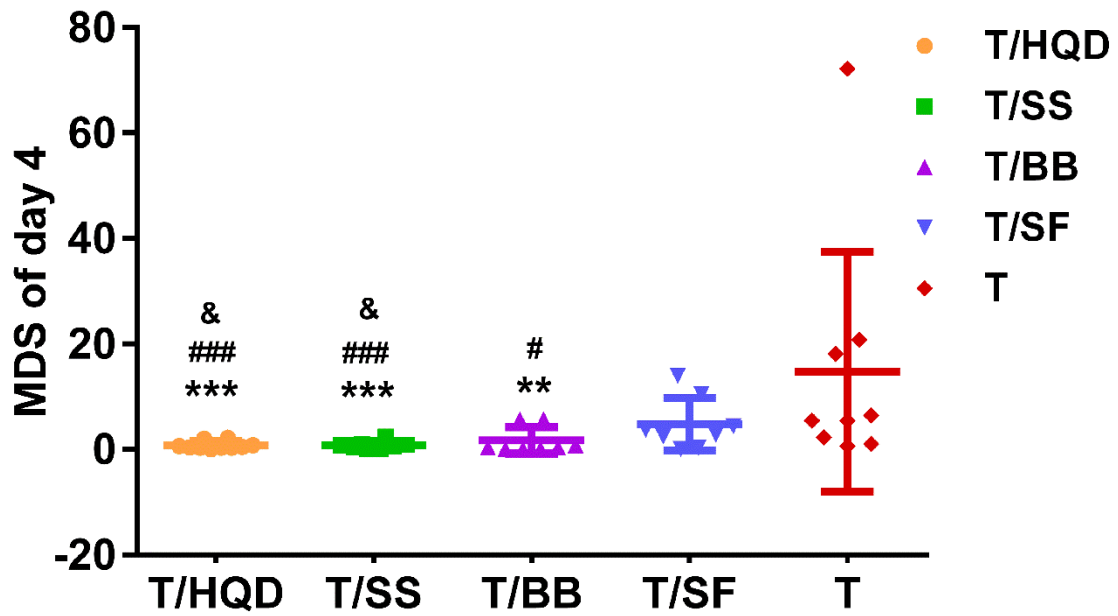

**Fig. S7 MDS of groups T/HQD, T/SS, T/BB, T/SF and T at day 4.** \* $p < 0.05$ , \*\* $p < 0.01$ , \*\*\*  $p < 0.001$  vs. T group; # $p < 0.05$ , ## $p < 0.01$ , ###  $p < 0.001$  vs. SF group; &  $p < 0.05$ , &&  $p < 0.01$ , &&&  $p < 0.001$  vs. BB group. SS: single *S. baicalensis*; BB: baicalin and baicalein; SF: *S. baicalensis* free; T: CPT-11.

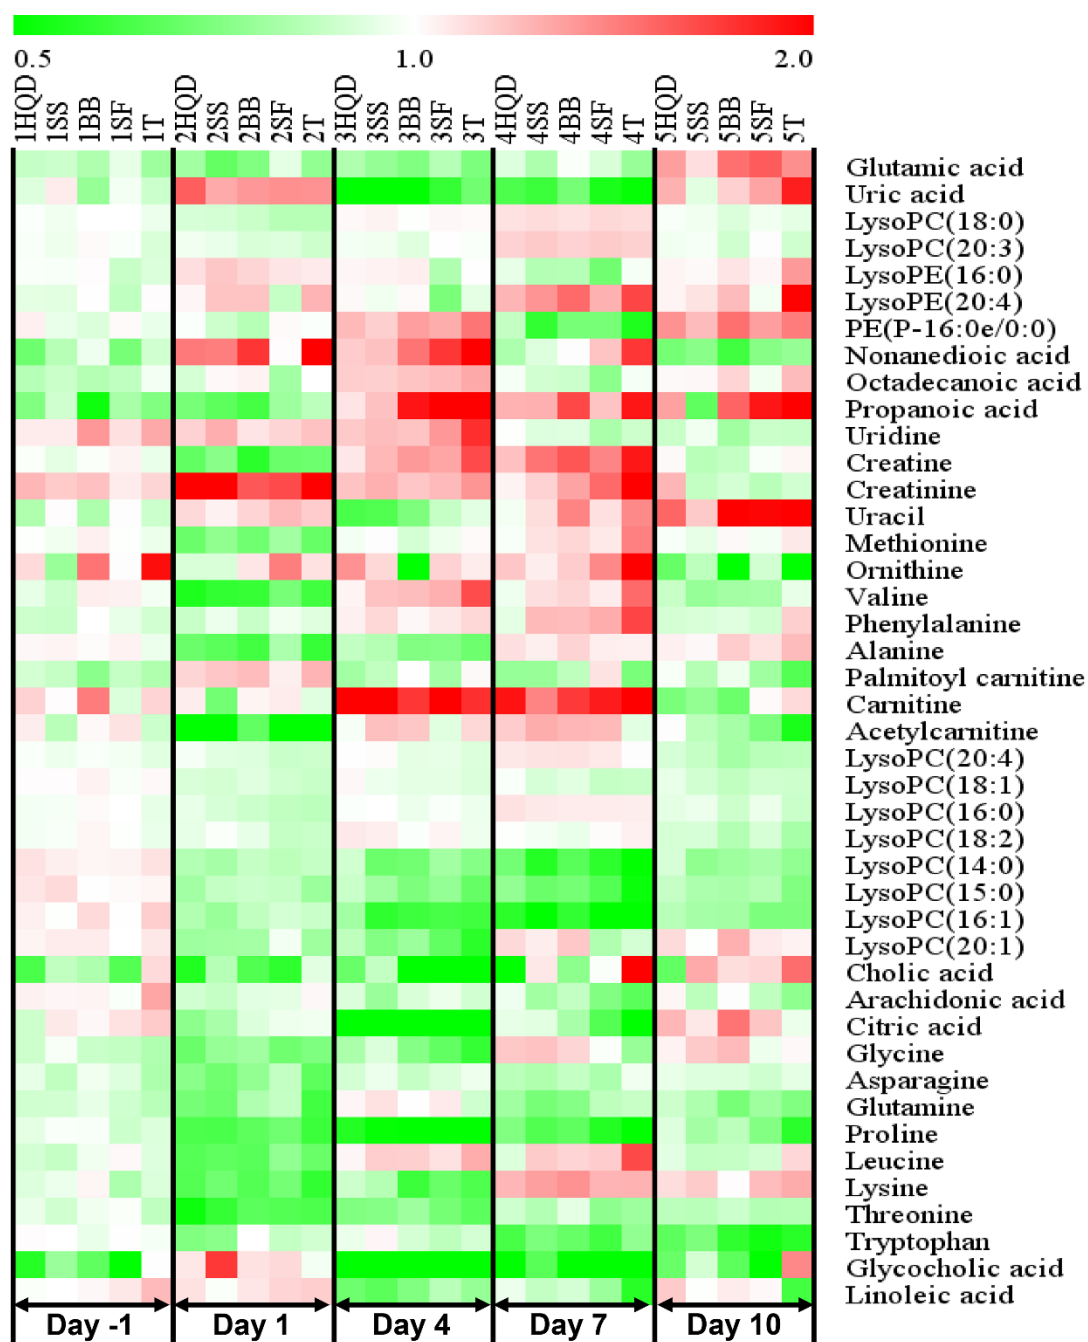

**Fig. S8 Heat map of fold-changes of differential metabolites induced by CPT-11 (T group vs. Control group,  $p < 0.05$ ).** Each *raw* represents a metabolite feature and each *column* represents a group in one time point. The row Z-score or scaled expression value of each feature is plotted in red–green color scale (red = increased concentration, green = decreased concentration). SS: single *S. baicalensis*; BB: baicalin and baicalein; SF: *S. baicalensis* free; T: CPT-11.

**Table S1** List of differential metabolites detected by GC-MS

| No. biomarker                 | m/z    | RT(min) | Similarity | <sup>a</sup> VIP | p-value | r value<br>(DS) <sup>b</sup> | value<br>(RBW) <sup>c</sup> |
|-------------------------------|--------|---------|------------|------------------|---------|------------------------------|-----------------------------|
| 1 Alanine <sup>*</sup>        | 110.88 | 7.137   | /          | 1.08             | 0.000   | -0.89                        | 0.79                        |
| 2 Arachidonic acid            | 85.11  | 22.329  | 83         | 1.29             | 0.030   | -0.77                        | 0.77                        |
| 3 Asparagine                  | 97.41  | 15.325  | 90         | 1.21             | 0.000   | -0.7                         | 0.27                        |
| 4 Citric acid                 | 227.48 | 17.077  | 90         | 1.86             | 0.002   | -0.72                        | 0.92                        |
| 5 Creatinine <sup>*</sup>     | 171.91 | 13.953  | /          | 1.97             | 0.002   | 0.66                         | -0.88                       |
| 6 Glutamic acid <sup>*</sup>  | 125.94 | 14.662  | /          | 1.34             | 0.016   | -0.07                        | -0.68                       |
| 7 Glutamine                   | 155.35 | 16.503  | 84         | 1.17             | 0.008   | -0.35                        | 0.57                        |
| 8 Glycine                     | 107.46 | 5.794   | 86         | 1.15             | 0.000   | -0.92                        | 0.83                        |
| 9 Leucine                     | 127.56 | 9.907   | 95         | 1.34             | 0.000   | -0.74                        | 0.26                        |
| 10 Linoleic acid <sup>*</sup> | 111.07 | 20.886  | /          | 1.44             | 0.011   | -0.75                        | 0.72                        |
| 11 Lysine <sup>*</sup>        | 174.60 | 15.706  | /          | 1.26             | 0.015   | -0.61                        | 0.17                        |
| 12 Methionine                 | 201.12 | 13.425  | 83         | 2.21             | 0.004   | 0.59                         | -0.78                       |
| 13 Nonanedioic acid           | 359.19 | 19.699  | 80         | 1.72             | 0.000   | 0.7                          | -0.7                        |
| 14 Octadecanoic acid          | 245.74 | 21.144  | 92         | 1.05             | 0.016   | 0.06                         | -0.63                       |
| 15 Ornithine <sup>*</sup>     | 70.13  | 14.600  | /          | 1.84             | 0.019   | 0.58                         | -0.72                       |
| 16 Phenylalanine              | 117.61 | 14.816  | 95         | 1.35             | 0.030   | 0.69                         | -0.85                       |
| 17 Proline <sup>*</sup>       | 163.66 | 13.516  | /          | 2.11             | 0.000   | -0.85                        | 0.9                         |
| 18 Propanoic acid             | 110.48 | 6.398   | 96         | 1.83             | 0.006   | 0.57                         | -0.58                       |
| 19 Threonine <sup>*</sup>     | 137.30 | 11.636  | /          | 1.38             | 0.001   | -0.74                        | 0.12                        |
| 20 Tryptophan <sup>*</sup>    | 238.34 | 21.182  | /          | 1.61             | 0.008   | -0.5                         | 0.64                        |
| 21 Uracil                     | 162.45 | 10.924  | 83         | 2.34             | 0.008   | 0.19                         | -0.77                       |
| 22 Uric acid <sup>*</sup>     | 304.67 | 20.045  | /          | 1.53             | 0.045   | -0.41                        | 0.6                         |
| 23 Uridine                    | 131.13 | 18.434  | 80         | 1.24             | 0.002   | 0.57                         | -0.56                       |
| 24 Valine <sup>*</sup>        | 151.35 | 9.035   | /          | 1.39             | 0.002   | 0.72                         | -0.78                       |

Note: <sup>\*</sup> Metabolites identified by reference standards;

<sup>a</sup> Metabolite identified based on NIST 11, and peaks with similarity more than 80 % were assigned for compound names;

<sup>b</sup> Correlation coefficients of Pearson's correlation analysis between differential metabolites and DS;

<sup>c</sup> Correlation coefficients of Pearson's correlation analysis between differential metabolites and RBW.

**Table S2** List of differential metabolites detected by LC-MS

| No. | biomarker           | M/Z      | TR(min) | HMDB      | Adduct ions        | MS/MS fragment                         | VIP  | p-value | r value (DS) <sup>a</sup> | r value (RBW) <sup>b</sup> |
|-----|---------------------|----------|---------|-----------|--------------------|----------------------------------------|------|---------|---------------------------|----------------------------|
| 1   | Acetylcarnitine     | 204.1223 | 0.617   | HMDB00201 | [M+H] <sup>+</sup> | 203.0515, 145.0481                     | 2.99 | 0.000   | -0.67                     | 0.27                       |
| 2   | Carnitine           | 162.1123 | 0.616   | HMDB00062 | [M+H] <sup>+</sup> | /                                      | 1.11 | 0.002   | 0.32                      | -0.67                      |
| 3   | Creatine            | 131.0694 | 0.653   | HMDB00064 | [M+H] <sup>+</sup> | /                                      | 1.07 | 0.000   | 0.78                      | -0.76                      |
| 4   | Cholic acid         | 407.2579 | 9.932   | HMDB00619 | [M-H] <sup>-</sup> | 408.264, 407.2631                      | 2.12 | 0.008   | -0.53                     | 0.62                       |
| 5   | Glycocholic acid    | 464.2773 | 8.797   | HMDB00138 | [M-H] <sup>-</sup> | 465.3042, 402.2985                     | 1.21 | 0.000   | -0.52                     | 0.43                       |
| 6   | LysoPC (14:0)       | 468.3058 | 11.748  | HMDB10379 | [M+H] <sup>+</sup> | 450.2949, 184.0748                     | 1.37 | 0.002   | -0.55                     | 0.94                       |
| 7   | LysoPC (15:0)       | 482.3211 | 12.517  | HMDB10381 | [M+H] <sup>+</sup> | 464.3118, 405.2478, 184.0715           | 1.17 | 0.000   | -0.73                     | 0.83                       |
| 8   | LysoPC (16:0)       | 496.3366 | 13.304  | HMDB10382 | [M+H] <sup>+</sup> | 478.3288, 184.0742                     | 2.73 | 0.002   | -0.75                     | 0.34                       |
| 9   | LysoPC (16:1)       | 494.3208 | 12.207  | HMDB10383 | [M+H] <sup>+</sup> | 476.3127, 417.2412, 184.0732           | 2.40 | 0.002   | -0.58                     | 0.92                       |
| 10  | LysoPC (18:0)       | 524.3679 | 14.962  | HMDB10384 | [M+H] <sup>+</sup> | 506.3404, 311.2891, 184.0739           | 2.58 | 0.001   | -0.69                     | 0.33                       |
| 11  | LysoPC (18:1)       | 522.3523 | 13.725  | HMDB02815 | [M+H] <sup>+</sup> | 504.3431, 445.2648, 380.8514, 184.0727 | 1.39 | 0.030   | -0.47                     | 0.72                       |
| 12  | LysoPC (18:2)       | 520.3375 | 12.740  | HMDB10386 | [M+H] <sup>+</sup> | 502.3286, 184.0742                     | 1.70 | 0.006   | -0.64                     | 0.31                       |
| 13  | LysoPC (20:1)       | 550.3830 | 15.303  | HMDB10391 | [M+H] <sup>+</sup> | 532.3762, 184.0742                     | 1.22 | 0.000   | -0.87                     | 0.83                       |
| 14  | LysoPC (20:3)       | 546.3469 | 14.977  | HMDB10394 | [M+H] <sup>+</sup> | 528.3249, 184.0644                     | 1.20 | 0.003   | 0.46                      | -0.64                      |
| 15  | LysoPC (20:4)       | 544.3364 | 12.786  | HMDB10396 | [M+H] <sup>+</sup> | 184.0723                               | 1.11 | 0.046   | -0.60                     | 0.58                       |
| 16  | LysoPE (16:0)       | 454.2906 | 13.075  | HMDB11503 | [M+H] <sup>+</sup> | 436.2805, 313.2697                     | 1.21 | 0.004   | 0.43                      | -0.77                      |
| 17  | lysoPE (20:4)       | 502.2896 | 12.610  | HMDB11517 | [M-H] <sup>+</sup> | 303.2275, 259.2384, 205.1936           | 1.48 | 0.004   | 0.45                      | -0.94                      |
| 18  | Palmitoyl carnitine | 400.3429 | 13.845  | HMDB00222 | [M+H] <sup>+</sup> | 338.3367, 239.2344, 341.2645           | 1.06 | 0.000   | 0.76                      | -0.19                      |
| 19  | PE (P-16:0e/0:0)    | 438.2968 | 13.530  | HMDB11152 | [M+H] <sup>+</sup> | 420.2847, 284.2948, 266.2715           | 1.24 | 0.000   | 0.86                      | -0.84                      |

Note: <sup>a</sup> Correlation coefficients of Pearson's correlation analysis between differential metabolites and DS; <sup>b</sup> Correlation coefficients of Pearson's correlation analysis between differential metabolites and RBW.
